# Supplementary material
Source: PubMed Central journal article supplement (PMC6310622)
Supplement: NIHMS1507831-supplement-1.pdf [file NIHMS1507831-supplement-1.pdf]

Supplemental Table 1.

## Bivariate Associations between Patient Characteristics and Baseline Hopes for Unqualified Cure

|                                                  | Unqualified cure hopes (n=265) | X <sup>2</sup> | P value |
|--------------------------------------------------|--------------------------------|----------------|---------|
| Age group                                        |                                |                |         |
| <57 y (youngest quartile)                        | 25%                            | 12.7048        | <.001   |
| ≥58 y                                            | 8%                             |                |         |
| Gender                                           |                                |                |         |
| Male                                             | 12%                            | 0.0938         | 0.76    |
| Female                                           | 13%                            |                |         |
| Race                                             |                                |                |         |
| White                                            | 13%                            | 1.0389         | 0.31    |
| Non-white                                        | 7%                             |                |         |
| Education                                        |                                |                |         |
| ≤High school                                     | 12%                            | 0.0014         | 0.97    |
| >High school                                     | 13%                            |                |         |
| Yearly Income                                    |                                |                |         |
| ≤\$50,000                                        | 11%                            | 1.0543         | 0.31    |
| >\$50,000                                        | 16%                            |                |         |
| Relationship status                              |                                |                |         |
| In committed                                     | 14%                            | 1.4750         | 0.22    |
| Not in committed                                 | 9%                             |                |         |
| Religion                                         |                                |                |         |
| Christian                                        | 12%                            | 0.5479         | 0.46    |
| Other                                            | 15%                            |                |         |
| Cancer type                                      |                                |                |         |
| Aggressive                                       | 16%                            | 2.7267         | 0.10    |
| Non-aggressive                                   | 9%                             |                |         |
| Location                                         |                                |                |         |
| Sacramento, California                           | 12%                            | 0.0753         | 0.78    |
| Rochester, New York                              | 13%                            |                |         |
| Primary care physician discussion <sup>a</sup>   |                                |                |         |
| Not substantive                                  | 16%                            | 5.2633         | 0.02    |
| Substantive                                      | 6%                             |                |         |
| Oncologist discussion <sup>a</sup>               |                                |                |         |
| Not substantive                                  | 12%                            | 0.0268         | 0.87    |
| Substantive                                      | 13%                            |                |         |
| Nurse/nurse practitioner discussion <sup>a</sup> |                                |                |         |
| Not substantive                                  | 14%                            | 0.6533         | 0.42    |
| Substantive                                      | 10%                            |                |         |
| Spouse/partner discussion <sup>a</sup>           |                                |                |         |
| Not substantive                                  | 14%                            | 0.0005         | 0.98    |
| Substantive                                      | 14%                            |                |         |
| Other family or friend discussion <sup>a</sup>   |                                |                |         |
| Not substantive                                  | 11%                            | 0.0906         | 0.76    |
| Substantive                                      | 13%                            |                |         |
| Clergy discussion <sup>a</sup>                   |                                |                |         |
| Not substantive                                  | 15%                            | 3.2608         | 0.07    |
| Substantive                                      | 5%                             |                |         |
| Support group/online discussion <sup>a</sup>     |                                |                |         |
| Not substantive                                  | 13%                            | 0.1687         | 0.68    |
| Substantive                                      | 10%                            |                |         |

<sup>a</sup>Hope discussion quality was rated by patients on a 5-point scale and dichotomized for analysis. “Not substantive” included those who responded they discussed hopes *not at all* or *a little bit*, whereas “substantive” included those who responded they discussed hopes *somewhat*, *quite a bit*, or *very much*

Supplemental Table 2.

## Bivariate Associations between Patient Characteristics and Baseline Hopes for Quality of Life

|                                                     | Hopes for quality of<br>life (n=265) | X <sup>2</sup> | P value |
|-----------------------------------------------------|--------------------------------------|----------------|---------|
| Age group                                           |                                      |                |         |
| <57 y (youngest quartile)                           | 36%                                  | 1.0702         | 0.30    |
| ≥58 y                                               | 43%                                  |                |         |
| Gender                                              |                                      |                |         |
| Male                                                | 40%                                  | 0.1225         | 0.73    |
| Female                                              | 42%                                  |                |         |
| Race                                                |                                      |                |         |
| White                                               | 42%                                  | 0.0317         | 0.86    |
| Non-white                                           | 40%                                  |                |         |
| Education                                           |                                      |                |         |
| ≤High school                                        | 42%                                  | 0.38           | 0.85    |
| >High school                                        | 41%                                  |                |         |
| Yearly Income                                       |                                      |                |         |
| ≤\$50,000                                           | 42%                                  | 0.0007         | 0.98    |
| >\$50,000                                           | 42%                                  |                |         |
| Relationship status                                 |                                      |                |         |
| In committed                                        | 44%                                  | 1.0836         | 0.30    |
| Not in committed                                    | 37%                                  |                |         |
| Religion                                            |                                      |                |         |
| Christian                                           | 40%                                  | 0.8323         | 0.36    |
| Other                                               | 46%                                  |                |         |
| Cancer type                                         |                                      |                |         |
| Aggressive                                          | 47%                                  | 2.8684         | 0.09    |
| Non-aggressive                                      | 36%                                  |                |         |
| Location                                            |                                      |                |         |
| Sacramento, California                              | 32%                                  | 5.5232         | 0.019   |
| Rochester, New York                                 | 47%                                  |                |         |
| Primary care physician<br>discussion <sup>a</sup>   |                                      |                |         |
| Not substantive                                     | 44%                                  | 0.9442         | 0.33    |
| Substantive                                         | 38%                                  |                |         |
| Oncologist discussion <sup>a</sup>                  |                                      |                |         |
| Not substantive                                     | 43%                                  | 0.0609         | 0.81    |
| Substantive                                         | 41%                                  |                |         |
| Nurse/nurse practitioner<br>discussion <sup>a</sup> |                                      |                |         |
| Not substantive                                     | 39%                                  | 2.1889         | 0.14    |
| Substantive                                         | 48%                                  |                |         |
| Spouse/partner discussion <sup>a</sup>              |                                      |                |         |
| Not substantive                                     | 36%                                  | 0.3478         | 0.56    |
| Substantive                                         | 42%                                  |                |         |
| Other family or friend<br>discussion <sup>a</sup>   |                                      |                |         |
| Not substantive                                     | 36%                                  | 1.0036         | 0.316   |
| Substantive                                         | 43%                                  |                |         |
| Clergy discussion <sup>a</sup>                      |                                      |                |         |
| Not substantive                                     | 42%                                  | 0.2937         | 0.59    |
| Substantive                                         | 38%                                  |                |         |
| Support group/online discussion <sup>a</sup>        |                                      |                |         |
| Not substantive                                     | 42%                                  | 0.0014         | 0.97    |
| Substantive                                         | 41%                                  |                |         |

<sup>a</sup>Hope discussion quality was rated by patients on a 5-point scale and dichotomized for analysis. “Not substantive” included those who responded they discussed hopes *not at all* or *a little bit*, whereas “substantive” included those who responded they discussed hopes *somewhat*, *quite a bit*, or *very much*
